1 **Factors associated with breast lesions among women attending select**  
2 **teaching and referral health facilities in Kenya: a cross-sectional study.**

3  
4 Josephine Nyabeta Rioki<sup>1\*</sup>, Marshal Mweu<sup>2</sup>, Emily Rogena<sup>3</sup>, Elijah M. Songok<sup>4</sup>, Joseph  
5 Mwangi<sup>4</sup>, Lucy Muchiri<sup>1</sup>

6 <sup>1</sup>Department of Human Pathology, Faculty of Health Sciences, University of Nairobi

7 <sup>2</sup>Department of Public and Global Health, Faculty of Health Sciences, University of  
8 Nairobi

9 <sup>3</sup>Department of Human Pathology, School of Medicine, Jomo Kenyatta University of Agriculture  
10 and Technology

11 <sup>4</sup>Kenya Medical Research Institute (KEMRI)

12

13

14 \*Corresponding author

15

16 Email: [jrioki@uonbi.ac.ke](mailto:jrioki@uonbi.ac.ke) (JNR)

17

## 18 Abstract

19 **Background:** Despite extensive research on the risk factors for breast cancer, little is known  
20 about the factors contributing to other breast lesions, of which some may indicate an increased  
21 risk for this disease. The objective of this study was to identify the risk factors for breast lesions  
22 among women with breast lumps seeking care at select teaching and referral hospitals in Kenya  
23 between December 2016 to December 2019.

24 **Methods:** An analytical cross-sectional study design was used to investigate the risk factors for  
25 breast lesions among 651 women with breast lumps. Data was collected using a semi-structured  
26 questionnaire. A multivariable logistic regression model was used to evaluate the impact of the  
27 predictors on the breast lesions. Ethical approval was granted by Kenyatta National Hospital  
28 (KNH) and the University of Nairobi Ethics and Research Committee (UoN-ERC) under study  
29 number P334/04/2016.

30 **Results:** The median age of participants was 30 years (range 16-87), with the majority having  
31 secondary education and belonging to the Kikuyu ethnic group. Parity, exercise, and  
32 contraceptive use were significant predictors of breast lesions identified. Nulliparous women had  
33 significantly lower odds of developing malignant (aOR: 0.11; 95% CI: 0.05-0.26), and suspicious  
34 (aOR: 0.23; 95% CI: 0.07-0.71) lesions. Regular exercise was associated with lower odds of both  
35 malignant and suspicious lesions. Conversely, contraceptive use increased the odds of developing  
36 atypical (aOR 0.92; 95% CI: 0.28-2.98) lesions, suspicious (aOR 0.33; 95% CI: 0.14-0.78), and  
37 malignant lesions (aOR of 0.31; 95% CI: 0.18- 0.55).

38 **Conclusion:** Exercise, parity, and hormonal contraception were independently found to be  
39 significant predictors of breast lesions. These findings underscore the necessity for personalized  
40 risk reduction strategies and emphasize the importance of understanding the risk factors for both  
41 benign and malignant breast disease to inform public health policies.

42 **Keywords:** Breast cancer, factors, women, breast lesions

## 43 **Background**

44 The most frequently diagnosed breast disease among women worldwide is breast cancer (BC),  
45 also referred to as a malignant breast lesion. About 80% of patients with the disease are  
46 individuals aged >50 [1]. It is recorded that BC incidence rates are higher but with low mortality  
47 rates in transitioned versus transitioning countries [2]. The incidence is noted to be higher  
48 among white women unlike black women, who have higher mortality [3]. In Kenya, the rise in  
49 BC incidence has been reported with a prediction that by 2025, it will surge by a devastating 35%  
50 [4].

51 About half of breast cancers can be explained by known risk factors (such as age and female  
52 gender) while the other half may not be known [5]. However, even with known risk factors, it  
53 is not certain that females with other risk factors will get BC. Based on calculated incidence rates,  
54 about 12.9% of women will develop BC in their lifetime. Risk factors for BC are classified into  
55 modifiable and non-modifiable factors. Modifiable risk factors include education level, parity,  
56 breastfeeding, passive smoking, and obesity. Non-modifiable risk factors include age, age at  
57 menarche, menopause, family history of any type of cancer, and family history of BC [6-8].

58 Global studies have examined the impact of reproductive factors on BC risk, including age at  
59 menarche, age at first childbirth, age at menopause, parity, breastfeeding, number of pregnancies,  
60 and the occurrence of abortion [9, 10]. Existing literature indicates that changes in reproductive  
61 patterns, such as lower parity, delayed pregnancies, and shorter breastfeeding duration,  
62 contribute to an increased susceptibility to BC in women [11]. Another previous research has  
63 also suggested that prolonged exposure to endogenous oestrogen due to early menarche, delayed  
64 first childbirth, late menopause, or exogenous exposure through hormone replacement therapy  
65 or oral contraceptive use, are associated with a higher risk of BC [10]. Physical exercise has been

66 shown to affect the fourteen hallmarks of breast cancer, thereby preventing the development of  
67 the disease [12].

68 Though extensive research has been done focusing on the factors associated with BC, little is  
69 documented on the factors associated with other breast lesions such as benign, atypical, and  
70 suspicious lesions. Some of these lesions are associated with the risk of developing the disease.  
71 Notably, among women diagnosed with invasive breast cancer, 30% had benign breast disease  
72 previously [13]. Among all atypical breast lesions, atypical ductal hyperplasia (ADH) has the  
73 highest likelihood of progressing to malignancy [14].

74 Since there are differences in population structure, cultural factors, and the adoption of  
75 Western lifestyles across different regions, this study aimed to identify the factors associated  
76 with BC and other breast lesions among women in Kenya. Understanding these context-specific  
77 factors is crucial to inform the development of personalized risk reduction strategies and public  
78 health Policies. We report the association between parity, hormonal contraception, and physical  
79 exercise with breast lesions from a hospital-based cross-sectional study of 651 women in Kenya.

## 80 **Material and methods**

### 81 **Ethical considerations**

82 Approval to conduct this study was granted by the Kenyatta National Hospital and the  
83 University of Nairobi Ethics and Research Committee (study no. P334/04/2016) as well as the  
84 institutional review boards of the select facilities. All participants provided written informed  
85 consent. The study was conducted following the Helsinki Declaration.

### 86 **Study design**

87 This was a cross-sectional study aimed at investigating the factors associated with breast lesions  
88 (benign, atypical, suspicious, and malignant breast lesions) among women attending select  
89 teaching and referral health facilities in Kenya between December 2016 to December 2019. The

90 study was reported as per the STROBE guidelines for reporting observational studies [15]. This  
91 work is part of a larger study, [reference number P334/04/2016] whose main objective was to  
92 characterize breast cancer phenotypes and genotypes among women diagnosed with breast  
93 cancer at selected teaching and referral health facilities in Kenya.

## 94 **Study sites**

95 This study was conducted in two major health facilities in Kenya. The sites were selected due to  
96 their status as major referral centres with well-established and busy fine needle aspiration (FNA)  
97 clinics that attend to a significant number of women with breast lumps.

98 Kenyatta National Hospital [KNH] is a Level 6 teaching and national tertiary referral health  
99 facility situated in the capital city. It is also a teaching hospital for the University of Nairobi  
100 Faculty of Health Sciences. The hospital has FNA clinic that runs once a week and receives about  
101 10-15 women with breast lumps a week.

102 Nakuru County Referral Hospital [NCRH] is a large county referral hospital located in Nakuru  
103 town west of Nairobi. The hospital has FNA clinic that runs once a week. It receives about 10  
104 women with breast lumps per week.

## 105 **Study population, eligibility, and selection of participants**

106 The study population consisted of all women with palpable breast lumps presenting to the FNA  
107 clinics at NCRH and KNH for care. To be eligible for participation in the study, a woman had to  
108 meet the criteria which included the presence of a palpable breast lump and the provision of  
109 written informed consent for participation. Women with breast lumps due to trauma were  
110 excluded from the study.

111

112

## 113 **Outcome definitions**

114 A breast lesion was defined as a mass that could either be classified as benign, atypical, suspicious  
115 of malignancy, or malignant (cancerous). The classification was based on the International  
116 Academy of Cytology Yokohama System (IAC YS) as follows:

117 A benign lesion is a diagnosis made in cases with unequivocally benign cytological features,  
118 which may or may not be diagnostic of a specific benign lesion. The criteria include a pattern of  
119 predominantly large, cohesive monolayered sheets of uniform ductal epithelial cells or cohesive  
120 3-dimensional epithelial tissue fragments showing streaming of epithelial cells around irregular  
121 slit-like holes (secondary lumina’); there may be a mix of smaller tissue fragments and sheets, but  
122 dispersal is usually not prominent [16].

123 Atypical lesion is defined as the presence of cytological features seen predominantly in  
124 benign processes or lesions, but with the addition of some features that are uncommon in benign  
125 lesions, and which may be seen in malignant lesions. The criteria include, high cellularity,  
126 dispersal of intact single cells, varying degrees of nuclear enlargement and pleomorphism and  
127 the presence of nucleoli, -features seen in both fibroadenoma and carcinomas [16].

128 Suspicious of malignancy is defined as the presence of some cytomorphological features which  
129 are usually found in malignant lesions, but with insufficient malignant features, either in number  
130 or quality, to make a definitive diagnosis of malignancy. The criteria include, high cellularity,  
131 overlapping of the cytological criteria for benign and malignant tumors, large epithelial tissue  
132 fragments, with some showing a cribriform or micropapillary architecture, in association with  
133 smaller tissue fragments and plentiful dispersed cells showing low- to intermediate-grade nuclear  
134 atypia [16].

135 A malignant cytopathological diagnosis is an unequivocal statement that the material is  
136 malignant. The criteria include the following: for high grade carcinomas, there is predominantly  
137 discohesive smaller tissue fragments with some dispersed single cells, moderate to high N:C ratio,  
138 marked irregular chromatin and prominent nucleoli. For low grade carcinoma, high cellularity,  
139 predominance of large irregular 3D epithelial tissue fragments with some smaller fragments and  
140 dispersed single cells [17]. These are features of breast cancer.

## 141 **Data collection and study variables**

142 Three research assistants were recruited and trained to assist with data collection. Quantitative  
143 data were collected using structured questionnaires. Information gathered included:  
144 demographics (Age, ethnicity, education level, employment status), family history of breast  
145 cancer, reproductive factors (menstrual cycle, menstrual status, parity), hormonal contraceptive  
146 use, and lifestyle factors (history of smoking, alcohol history, and exercise). The predictors  
147 assessed in this study are summarised in Table 1.

148

149 **Table 1: Predictor variables and their measurements**

| Variables                      | Measurements                                                                                                                                                                                |
|--------------------------------|---------------------------------------------------------------------------------------------------------------------------------------------------------------------------------------------|
| Age (continuous)               | Captured in years                                                                                                                                                                           |
| Level of education (ordinal)   | Assessed in four levels: None, primary, secondary, and tertiary                                                                                                                             |
| Ethnicity (nominal)            | Major tribes in Kenya captured as specific tribes (Kikuyu, Luo, Luhya, Kalenjin, Kamba) and minor tribes captured as others                                                                 |
| Employment status (nominal)    | Captured as employed or unemployed                                                                                                                                                          |
| Menstrual cycle (nominal)      | Captured as regular or irregular                                                                                                                                                            |
| Menstrual status (nominal)     | Captured as premenopausal or post-menopausal                                                                                                                                                |
| Parity (nominal)               | Captured as nulliparous or parous                                                                                                                                                           |
| Contraception use (nominal)    | Captured as those who had ever used either implant, oral and injection forms at any given time, or implant and oral only, injection only, oral only, implant only and never used any method |
| Family history of BC (nominal) | Captured as yes for those with family history or no for those without family history                                                                                                        |
| Smoking history (nominal)      | Captured as yes for those who have ever smoked or no for those who have never smoked.                                                                                                       |
| Alcohol history (nominal)      | Captured as yes for those who have ever taken alcohol and no for those who have never taken alcohol                                                                                         |
| Exercises (nominal)            | Captured as yes for those who perform regular exercises and no for those that do not                                                                                                        |

150

## 151 **Data processing and statistical analysis**

152 Responses for qualitative variables from the questionnaires were coded before data entry. The  
153 data were entered in an MS Excel spreadsheet and exported to Stata v13 software for cleaning  
154 and analysis. Continuous variables were summarized using the median and range. For categorical  
155 variables, proportions were computed. To assess the association between the study predictors  
156 and the breast lesion outcome, a univariable multinomial logistic regression model was used.  
157 Predictors with  $p \leq 0.2$  in the univariable analysis were included in the multivariable analysis. Due  
158 to small number of observations in some categories of contraceptive use, this variable was  
159 recategorized into a binary variable: use versus no use.

160 For the multivariable analysis, significant variables from the univariable analysis were  
161 offered to a multinomial logistic regression model and their significance was evaluated at a strict



162  $p \leq 0.05$ . To minimize confounding, non-significant variables were only excluded from the model  
163 when the coefficients of the remaining variables did not change by more than 30%. The validity  
164 of the final parsimonious model was assessed by testing the assumption of independence  
165 irrelevant alternatives using the Hausman-McFadden test. The null hypothesis for the test is  
166 that the model is valid at  $p > 0.05$ .

## 167 **Results**

### 168 **Descriptive statistics**

169 A total of 651 women with breast lumps were eligible for inclusion in the study. The median age  
170 for the participants was 30 years (Range: 16-97 years). Most women had attained secondary  
171 education (45.9%,  $n=299$ ) while 0.6% ( $n=4$ ) had no formal education. Kikuyus were the majority  
172 (54.5%,  $n=355$ ) with breast lumps followed by other tribes (19.4%,  $n=126$ ). Most participants  
173 had formal employment (54.5%,  $n=355$ ). The majority (83.3%,  $n=542$ ) of the participants were  
174 premenopausal. Those with regular menstrual cycle were 87% ( $n=569$ ) and 52.8% ( $n=344$ ) were  
175 parous while 47.2% ( $n=307$ ) were nulliparous. Among women using hormonal contraception  
176 methods, 29.3% ( $n=190$ ) had used oral pills only while 0.9% ( $n=6$ ) had used three methods (oral,  
177 injection and implant) in their lifetime. Among the study participants, 10.5% ( $n=68$ ) were  
178 diagnosed with malignant lesions (breast cancer), 4.2% ( $n=27$ ) with lesions suspicious of  
179 malignancy, 1.8% ( $n=12$ ) atypical cytologic findings, and 83.6% ( $n=544$ ) benign lesions. The  
180 descriptive statistics for the predictors of breast lesions are displayed in Table 2.

181  
182  
183  
184  
185  
186  
187  
188  
189  
190

191  
192  
193 **Table 2: Descriptive statistics of predictors of breast lesions among women with breast**  
194 **lumps attending two select teaching and referral health facilities in Kenya (n=651)**  
195

| Variable             | Responses              | Frequency n (%) |
|----------------------|------------------------|-----------------|
| Age (years)          | 16-97                  | -               |
| Level of education   | None                   | 4(0.6)          |
|                      | Primary                | 167(25.7)       |
|                      | Secondary              | 299(45.9)       |
|                      | Tertiary               | 181(27.8)       |
| Ethnicity            | Kamba                  | 48(7.4)         |
|                      | Kalenjin               | 26(4)           |
|                      | Luhya                  | 32(4.9)         |
|                      | Luo                    | 64(9.8)         |
|                      | Kikuyu                 | 355(54.5)       |
|                      | Others                 | 126(19.4)       |
| Employment status    | Yes                    | 355(54.5)       |
|                      | No                     | 296(45.5)       |
| Menstrual cycle      | Regular                | 569(87)         |
|                      | Irregular              | 82(12)          |
| Menstrual status     | Pre-menopause          | 542(83.3)       |
|                      | Menopause              | 109(16.7)       |
| Parity               | Parous                 | 344 (52.8)      |
|                      | Nulliparous            | 307(47.2)       |
| Contraception use    | Injection+Implant only | 4(0.6)          |
|                      | Oral+Injection+Implant | 6(0.9)          |
|                      | Oral+Implant only      | 13(2)           |
|                      | Oral+Injection only    | 19(2.9)         |
|                      | Implant only           | 26(4)           |
|                      | Injection only         | 65(10)          |
|                      | Oral only              | 190(29.3)       |
|                      | None                   | 326(50.2)       |
| Family history of BC | Yes                    | 32(4.9)         |
|                      | No                     | 618 (95.1)      |
| Smoking history      | Yes                    | 12(1.8)         |
|                      | No                     | 639(98.2)       |
| Alcohol history      | Yes                    | 40 (6.1)        |
|                      | No                     | 611(93.9)       |
| Exercise             | Yes                    | 326(50.1)       |
|                      | No                     | 325(49.9)       |

196 Key: n; number of respondents, %; percentage

197

198

## 199 **Logistic regression analyses**

### 200 **Univariable analysis**

201 Based on the results from univariable analysis, age, ethnicity, level of education, employment  
202 status, menstruation status, parity, contraceptive use, family history of BC, and exercise were  
203 significantly associated with breast lesions at  $p \leq 0.20$  (Table 6. 3). These variables were offered  
204 to a multivariate multinomial model to minimize confounding.

205 **Table 3: Univariable analysis of the risk factors for breast lesions among women with**  
 206 **breast lumps attending two select referral health facilities in Kenya, using a multinomial**  
 207 **logistic regression model**  
 208

| Factors                      | Atypical lesions             | Suspicious lesions           | Malignant lesions | <i>P</i> -value  |
|------------------------------|------------------------------|------------------------------|-------------------|------------------|
|                              | cOR (95% C.I)                | cOR (95% C.I)                | cOR (95% C.I)     |                  |
| <b>Age in years*</b>         | 1.02(0.98, 1.06)             | 1.04(1.01, 1.06)             | 1.06(1.04, 1.07)  | <i>&lt;0.001</i> |
| <b>Ethnicity*</b>            |                              |                              |                   | <i>0.149</i>     |
| Kamba                        | 1.62(0.14, 18.51)            | 0.46(0.06, 3.92)             | 3.50(1.49, 8.21)  |                  |
| Kalenjin                     | 2.36(0.21, 27.22)            | 0.68(0.08, 5.77)             | 0.73(0.15, 3.45)  |                  |
| Luhya                        | 2.00(0.17, 22.91)            | 0.57(0.07, 4.85)             | 1.23(0.37, 4.09)  |                  |
| Luo                          | 1.79(0.25, 13.07)            | 5.39x10 <sup>-6</sup> (-, -) | 0.55(0.17, 1.77)  |                  |
| Kikuyu                       | 0.86(0.16, 4.50)             | 0.84(0.34, 2.07)             | 0.82(0.41, 1.63)  |                  |
| Others (Ref)                 | 1                            | 1                            | 1                 |                  |
| <b>Level of education*</b>   |                              |                              |                   | <i>0.008</i>     |
| None                         | 0.00(0,-)                    | 0.00(0,-)                    | 6.22(0.59,65.92)  |                  |
| Primary                      | 6.72(0.78, 58.17)            | 6.27(1.76, 22.29)            | 3.43(1.54, 7.68)  |                  |
| Secondary                    | 4.06(0.48, 34.03)            | 2.26(0.61,8.33)              | 2.63(1.23, 5.62)  |                  |
| Tertiary (Ref)               | 1                            | 1                            | 1                 |                  |
| <b>Employment status*</b>    |                              |                              |                   | <i>&lt;0.001</i> |
| Employed                     | 0.97(0.31, 3.05)             | 2.31(0.99, 5.36)             | 3.75(2.03, 6.90)  |                  |
| Unemployed (Ref)             | 1                            | 1                            | 1                 |                  |
| <b>Menstrual cycle</b>       |                              |                              |                   | <i>0.335</i>     |
| Irregular                    | 0.64(0.08, 5.01)             | 0.27(0.04, 2.02)             | 1.5(0.77, 2.94)   |                  |
| Regular                      | 1                            | 1                            | 1                 |                  |
| <b>Menstrual status*</b>     |                              |                              |                   | <i>&lt;0.001</i> |
| Menopause                    | 2.19(0.58, 8.26)             | 2.29(0.94, 5.62)             | 4.32(2.50, 7.45)  |                  |
| Pre-menopause (Ref)          | 1                            | 1                            | 1                 |                  |
| <b>Parity*</b>               |                              |                              |                   | <i>&lt;0.001</i> |
| Nulliparous                  | 0.43(0.13, 1.45)             | 0.15(0.05, 0.44)             | 0.10(0.04, 0.22)  |                  |
| Parous (Ref)                 | 1                            | 1                            | 1                 |                  |
| <b>Contraception use*</b>    | 6.34(1.38, 29.20)            | 10.14(3.02, 34.08)           | 3.52(2.00, 6.19)  | <i>&lt;0.001</i> |
| <b>Family history of BC*</b> |                              |                              |                   | <i>0.069</i>     |
| Yes                          | 4.52(0.94, 21.84)            | 2.35x10 <sup>-6</sup> (-, -) | 2.60(1.07, 6.30)  |                  |
| No (Ref)                     | 1                            | 1                            | 1                 |                  |
| <b>Smoking history</b>       |                              |                              |                   | <i>0.532</i>     |
| Yes                          | 3.67x10 <sup>-6</sup> (-, -) | 3.67x10 <sup>-6</sup> (-, -) | 2.74(0.72, 10.37) |                  |
| No (Ref)                     | 1                            | 1                            | 1                 |                  |
| <b>Alcohol history</b>       |                              |                              |                   | <i>0.953</i>     |
| Yes                          | 1.18x10 <sup>-6</sup> (-, -) | 0.56(0.07, 4.24)             | 0.91(0.31, 2.64)  |                  |
| No (Ref)                     | 1                            | 1                            | 1                 |                  |
| <b>Exercises*</b>            |                              |                              |                   | <i>&lt;0.001</i> |
| Yes                          | 0.86(0.27, 2.71)             | 0.36(0.16, 0.84)             | 0.36(0.21, 0.62)  |                  |
| No (Ref)                     | 1                            | 1                            | 1                 |                  |

209 Key: Reference category for outcome is Benign, \* Variables eligible for inclusion in the  
 210 multivariable model ( $p \leq 0.05$ ), cOR; crude odds ratio, CI; confidence interval.  
 211 <https://doi.org/10.7910/DVN/2OXWTA>

## 212 **Multivariable multinomial analysis**

213 Based on results from the multivariable analysis, parity, contraceptive use, and exercise were  
214 found to be significant predictors of breast lesions at less than 5% significance level. Table 4  
215 illustrates the odds ratios and confidence intervals for the breast lesion predictors across the  
216 three categories of breast lesion outcomes (atypical, suspicious, and malignant lesions).  
217 The odds of atypical, suspicious, and malignant diagnoses in nulliparous women are about one-  
218 tenth, close to a quarter, and four-fifths respectively [aOR: 0.11; 95% CI: 0.05-0.26; p=0.001,  
219 aOR: 0.23; 95% CI: 0.07-0.71, p=0.001; aOR: 0.79; 95% CI: 0.21-2.9, p=0.001] controlling for  
220 exercise and contraceptive use.

221 The odds of a diagnosis of atypical lesions is slightly less than a third (aOR: 0.31; 95% CI:  
222 0.18-0.55, p=0.001), for suspicious lesions is a third (aOR: 0.33; 95% CI: 0.14-0.78, p=0.001 ) and  
223 for malignant lesions is more than three quarters (aOR: 0.92; 95% CI: 0.28-2.98, p=0.001), in  
224 women who do regular exercise controlling for parity and contraceptive use.

225 The odds of diagnosing atypical lesions in women who use contraceptives are more than five  
226 times (aOR: 5.73; 95% CI: 1.14-28.94, p=0.002), for suspicious lesions is more than six times  
227 (aOR: 6.02; 95% CI: 1.73-20.95, p=0.002) while for malignant lesions it is more than one (aOR:  
228 1.8; 95% CI: 0.99-3.34, p=0.002) controlling for parity and exercises.

229 **Table 4: Multivariable analysis of the risk factors for breast lesions among women with breast**  
 230 **lumps attending two select teaching and referral health facilities in Kenya using a multinomial**  
 231 **logistic regression model**

| Factors       | Values      | Atypical lesions  | Suspicious of malignancy | Malignant lesions (Breast cancer) | <i>p-value</i> |
|---------------|-------------|-------------------|--------------------------|-----------------------------------|----------------|
|               |             | aOR (95% C.I)     | aOR (95% C.I)            | aOR (95% C.I)                     |                |
| Parity        | Nulliparous | 0.79(0.21, 2.9)   | 0.23(0.07, 0.71)         | 0.11(0.05, 0.26)                  | 0.001          |
|               | Parous      | 1                 | 1                        | 1                                 |                |
| Exercises     | Yes         | 0.92(0.28, 2.98)  | 0.33(0.14, 0.78)         | 0.31(0.18, 0.55)                  | 0.001          |
|               | No          | 1                 | 1                        | 1                                 |                |
| Contraception | Yes         | 5.73(1.14, 28.94) | 6.02(1.73, 20.95)        | 1.82(0.99, 3.34)                  | 0.002          |
|               | No          | 1                 | 1                        | 1                                 |                |

232 Key: aOR; adjusted odds ratio  
 233 <https://doi.org/10.7910/DVN/2OXWTA>  
 234

## 235 Discussion

236 The key findings of this study suggest that parity, exercise, and contraceptive use are significant  
 237 predictors of breast cancer and other breast lesions among women in Kenya. Nulliparity was found  
 238 to have a substantial protective effect against the development of both suspicious lesions of the breast  
 239 and BC. This is a contradictory finding to other studies in the literature that identified parity as  
 240 protective in the development of breast cancer, especially those that are ER+/PR+ [18-20].  
 241 However, our findings correlate with some studies that have reported parous women to be more likely  
 242 to develop triple-negative breast cancer [21-24]. This means that parity is not protective against all  
 243 types of BC as conventionally documented. Although nulliparous women had lower odds of  
 244 developing atypical lesions, the difference was not statistically significant. Nevertheless, there is an  
 245 indication that the likelihood of developing atypical breast lesions is lower in women who have never  
 246 given birth.

247 In this study, regular exercise was found to be significantly associated with a lower likelihood of  
 248 BC and other breast lesions. Comparing respondents who didn't regularly exercise, participants who

249 exercised were less likely to have BC and less likely to be diagnosed with suspicious lesions. There is  
250 strong evidence to support that physical exercise has a significant impact on reducing the odds of  
251 developing BC [25, 26]. This is mainly because exercise modulates BMI and reduces obesity, which  
252 are both risk factors for BC [27]. In addition, physical activity is associated with a significantly  
253 delayed onset of BC among breast cancer gene 1 and breast cancer gene 2 (BRCA1/2) mutation  
254 carriers [28, 29]. This is because exercise is known to enhance the body's Deoxyribonucleic acid  
255 (DNA) repair mechanisms, potentially correcting mutations that could lead to cancer. Though the  
256 odds of developing atypical breast lesions in this population were lower, the difference between those  
257 who reported having regular exercise and those who had never had regular exercise was not  
258 statistically different.

259 Our study established that participant who used hormonal contraceptives had higher odds of being  
260 diagnosed with BC. These findings compare with those of a study done in Jordan which indicated that  
261 regular use of oral contraception [OCs] increased the risk of BC [30]. Contraception use had also  
262 been associated with a substantially increased risk of developing suspicious lesions among  
263 contraception users and atypical lesions in this study.

264 In contraceptive usage, almost an equal number of participants had used compared to those who  
265 had not. A no-method preference has been reported as the second most preferred in some studies  
266 [31]. Our findings compare with data from 47 countries which indicated that 40.9% of women in  
267 need of contraception were not using any methods. Moreira and others have explored reasons for the  
268 non-use of contraception despite the unmet need. Major reasons for non-use included, health  
269 concerns, infrequent sex, and opposition from others [32]. Religious reasons and cultural factors may  
270 be the other reasons for non-use in our study population.

271 In terms of the breakdown of various contraceptives and their preference among women, the oral  
272 contraceptive was preferred. This finding is consistent with those reported in the literature [33]. Our

273 study also indicates multiple uses of hormonal contraception over time, where the same individuals  
274 had used oral, injection, or implant. Similar findings have been reported previously in the US [34].  
275 Simultaneous use of more than one contraception during sex has also been reported in the literature  
276 [35].

277 Patients' demographic and socioeconomic characteristics are important considerations in BC  
278 diagnosis and management. Most participants in this study had a minimum of secondary education  
279 suggesting a level of breast health awareness and positive health-seeking behavior in this population.  
280 Most participants were of the Kikuyu ethnic community. This is likely since this is the second most  
281 populous ethnic group in Nakuru County and the largest ethnic group in Kenya. In addition, Nairobi  
282 City is in close proximity to Central Kenya, a geographical region historically occupied by Kikuyus.  
283 Kikuyus being the majority attending the Breast FNA Clinic in KNH could be purely due to the case  
284 of accessibility in this case rather than other factors.

285 Concerning parity, a small difference was noted between the parous and nulliparous BC patients.  
286 Ideally, since many of the women in this study were in their thirties, one would have expected most  
287 of them to be parous, but this was not the case. This could have been due to lifestyle and priority  
288 changes. Most ladies would want to focus on their career paths before they start getting children  
289 while others plan to have babies after the age of 30 [36].

290 The prevalence of other known risk factors for cancer including family history, alcohol use, and  
291 smoking were very low among our study participants. Generally, a proportion of cancer cases are  
292 attributable to smoking and high alcohol consumption [37]. Exercises or no exercise/lack of it was  
293 almost equally practiced among our study participants. This is important to note since our  
294 participants seemed to do exercises at a higher percentage [about 50%] than one would expect in the  
295 general population. Data from Europe indicate that 60% of individuals aged 15 and above rarely or  
296 never participate in exercise or sports [38]. While physical exercise contributes to a healthy life, most



297 people do not engage in exercise. Physical inactivity is a major public health problem for people of all  
298 ages and is currently rated as the fourth-highest global risk factor for mortality and pathologies such  
299 as type 2 diabetes, coronary heart disease, and certain types of cancer [39]. Study participants in the  
300 current study probably participate in exercise due to increased awareness and need, based on their  
301 medical condition, or it is part of their lifestyle since an equal percentage did not as well.

302 Overall, from the univariable analysis, the factors that were found to be significantly associated  
303 with breast lesions included age, ethnicity, level of education, employment status, family history of  
304 BC, and exercise. The findings from this study correlate with those of other studies. The risk of BC  
305 increases with age [40]. Incidence also increases and reaches its peak in the age of menopause and  
306 then gradually decreases or remains constant [41]. Several studies have reported racial and ethnic  
307 variation in BC where a minority of women present with higher-stage BC than white women [42,  
308 43]. Such differences in race and ethnicity have also been discussed by others [42, 44, 45].

309 Education level and employment status were significantly associated with breast cancer in this  
310 study. This is consistent with other studies [46, 47]. This could be mainly because employment and  
311 education are associated with awareness, quality of life, and exposure to other risk factors like alcohol  
312 and smoking, as well as postponement of childbearing and number of children while women pursue  
313 further education and careers [48]. Family history is an important risk factor for BC as demonstrated  
314 in our study. This important association has been demonstrated previously and in other studies [49-  
315 53].

## 316 **Conclusion**

317 From this study, exercise, parity, and hormonal contraception were found to be significant  
318 predictors of breast cancer and other breast lesions. These findings warrant consideration of BC risk

319 reduction through empowering women to make informed reproductive choices and the choice of  
320 contraception use and weight management.

## 321 **Acknowledgement**

322 The authors wish to express their sincere gratitude to the study participants for contributing to the  
323 research. They also acknowledge the University of Nairobi's Building Capacity for Writing  
324 Scientific Manuscripts (UANDISHI) Program at the Faculty of Health Sciences for the training on  
325 manuscript writing.

## 326 **Author Contributions**

327 Conceptualization: Josephine Nyabeta Rioki, Emily Rogena.  
328 Data curation: Josephine Nyabeta Rioki, Marshal Mweu.  
329 Formal analysis: Josephine Nyabeta Rioki, Marshal Mweu.  
330 Funding acquisition: Josephine Nyabeta Rioki, Elijah Songok.  
331 Investigation: Josephine Nyabeta Rioki, Lucy Muchiri, Marshal Mweu, Elijah Songok, Emily  
332 Rogena.  
333 Methodology: Josephine Nyabeta Rioki, Marshal Mweu.  
334 Project administration: Josephine Nyabeta Rioki, Lucy Muchiri, Marshal Mweu, Elijah Songok,  
335 Emily Rogena.  
336 Supervision: Lucy Muchiri, Marshal Mweu, Elijah Songok, Emily Rogena.  
337 Writing – original draft: Josephine Nyabeta Rioki, Joseph Mwangi.  
338 Writing – review & editing: Josephine Nyabeta Rioki, Lucy Muchiri, Marshal Mweu, Elijah Songok,  
339 Emily Rogena.

## 340 **References**

- 341 1. Łukasiewicz S, Czezelewski M, Forma A, Baj J, Sitarz R, Stanisławek A. Breast Cancer—  
342 Epidemiology, Risk Factors, Classification, Prognostic Markers, and Current Treatment  
343 Strategies—An Updated Review. *Cancers*. 2021;13(17):4287. [https://www.mdpi.com/2072-](https://www.mdpi.com/2072-6694/13/17/4287)  
344 [6694/13/17/4287](https://www.mdpi.com/2072-6694/13/17/4287).
- 345 2. Sung H, Ferlay J, Siegel RL, Laversanne M, Soerjomataram I, Jemal A, et al. Global Cancer  
346 Statistics 2020: GLOBOCAN Estimates of Incidence and Mortality Worldwide for 36 Cancers in  
347 185 Countries. *CA A Cancer J Clinicians*. 2021 M;71(3):209–49.  
348 <https://acsjournals.onlinelibrary.wiley.com/doi/10.3322/caac.21660>.
- 349 3. Zavala VA, Bracci PM, Carethers JM, Carvajal-Carmona L, Coggins NB, Cruz-Correa MR, et al.  
350 Cancer health disparities in racial/ethnic minorities in the United States. *Br J Cancer*.  
351 2021;124(2):315–32. <https://www.nature.com/articles/s41416-020-01038-6>.
- 352 4. Gakunga R, Ali Z, Korir A, Kinyanjui AW, Ochieng' E, Gikaara N, et al. Social determinants and  
353 individual health-seeking behaviour among women in Kenya: protocol for a breast cancer cohort  
354 feasibility study. *BMJ Open*. 2019;9(1):e023171.  
355 <https://bmjopen.bmj.com/lookup/doi/10.1136/bmjopen-2018-023171>.
- 356 5. Chlebowski R. Factors that modify breast cancer risk in women [Internet]. 2024 [cited 2024 May  
357 22]. <https://medilib.ir/uptodate/show/792>.
- 358 6. Khoramdad M, Solaymani-Dodaran M, Kabir A, Ghahremanzadeh N, Hashemi EOS, Fahimfar N, et  
359 al. Breast cancer risk factors in Iranian women: a systematic review and meta-analysis of matched  
360 case-control studies. *Eur J Med Res*. 2022;27(1):311.

- 361 7. Arafat HM, Omar J, Muhamad R, Al-Astani TAD, Shafii N, Al Laham NA, et al. Breast Cancer Risk  
362 From Modifiable and Non-Modifiable Risk Factors among Palestinian Women: A Systematic  
363 Review and Meta-Analysis. *Asian Pac J Cancer Prev.* 2021;22(7):1987–95.
- 364 8. Daly AA, Rolph R, Cutress RI, Copson ER. A Review of Modifiable Risk Factors in Young Women  
365 for the Prevention of Breast Cancer. *Breast Cancer (Dove Med Press).* 2021; 13:241–57.
- 366 9. Anderson KN, Schwab RB, Martinez ME. Reproductive risk factors and breast cancer subtypes: a  
367 review of the literature. *Breast Cancer Res Treat [Internet].* 2014;144(1):1–10.  
368 <http://link.springer.com/10.1007/s10549-014-2852-7>.
- 369 10. Karim SM, Baeshen W, Neamatullah SN, Bin B. Oral Contraceptives, Abortion and Breast Cancer  
370 Risk: a Case Control Study in Saudi Arabia. *Asian Pacific Journal of Cancer Prevention.*  
371 2015;16(9):3957–60.  
372 <http://koreascience.or.kr/journal/view.jsp?kj=POCPA9&py=2015&vnc=v16n9&sp=3957>.
- 373 11. Inumaru LE, Irineu Gomes Duarte Quintanilha M, Aparecida Da Silveira É, Veloso Naves MM.  
374 Risk and Protective Factors for Breast Cancer in Midwest of Brazil. *Journal of Environmental and*  
375 *Public Health.* 2012; 2012:1–9. <http://www.hindawi.com/journals/jeph/2012/356851/>.
- 376 12. García-Chico C, López-Ortiz S, Peñín-Grandes S, Pinto-Fraga J, Valenzuela PL, Emanuele E, et al.  
377 Physical Exercise and the Hallmarks of Breast Cancer: A Narrative Review. *Cancers.*  
378 2023;15(1):324. <https://www.mdpi.com/2072-6694/15/1/324>.
- 379 13. Figueroa JD, Gierach GL, Duggan MA, Fan S, Pfeiffer RM, Wang Y, et al. Risk factors for breast  
380 cancer development by tumor characteristics among women with benign breast disease. *Breast*  
381 *Cancer Res.* 2021;23(1):34. [https://breast-cancer-](https://breast-cancer-research.biomedcentral.com/articles/10.1186/s13058-021-01410-1)  
382 [research.biomedcentral.com/articles/10.1186/s13058-021-01410-1](https://breast-cancer-research.biomedcentral.com/articles/10.1186/s13058-021-01410-1).

- 383 14. Amin AL, Wagner JL. Contemporary management of atypical breast lesions identified on  
384 percutaneous biopsy: a narrative review. *Ann Breast Surg.* 2021; 5:9–9.  
385 <https://abs.amegroups.com/article/view/6578/html>.
- 386 15. Von Elm E, Altman DG, Egger M, Pocock SJ, Gøtzsche PC, Vandenbroucke JP. The  
387 Strengthening the Reporting of Observational Studies in Epidemiology (STROBE) statement:  
388 guidelines for reporting observational studies. *Journal of Clinical Epidemiology.* 2008;61(4):344–9.  
389 <https://linkinghub.elsevier.com/retrieve/pii/S0895435607004362>.
- 390 16. Field AS, Raymond WA, Rickard M, Schmitt F. Breast fine needle aspiration biopsy cytology: the  
391 potential impact of the International Academy of Cytology Yokohama System for Reporting Breast  
392 Fine Needle Aspiration Biopsy Cytopathology and the use of rapid on-site evaluation. *Journal of the*  
393 *American Society of Cytopathology.* 2020;9(2):103–11.  
394 <https://linkinghub.elsevier.com/retrieve/pii/S2213294520300120>.
- 395 17. Brachtel EF, Field AS, Rickard MT, Raymond WA, Lee AHS, Chong PY, et al. Malignant. In: Field  
396 AS, Raymond WA, Schmitt F, editors. *The International Academy of Cytology Yokohama System*  
397 *for Reporting Breast Fine Needle Aspiration Biopsy Cytopathology.* Cham: Springer International  
398 Publishing; 2020. p. 83–118. [https://doi.org/10.1007/978-3-030-26883-1\\_6](https://doi.org/10.1007/978-3-030-26883-1_6).
- 399 18. Azubuike SO. Relationship between parity and breast cancer risk: A critical review of evidence (with  
400 focus on sub-Saharan Africa). *International Journal of Noncommunicable Diseases.* 2023;8(2):66.  
401 [https://journals.lww.com/ijnc/fulltext/2023/08020/Relationship\\_between\\_parity\\_and\\_breast\\_can](https://journals.lww.com/ijnc/fulltext/2023/08020/Relationship_between_parity_and_breast_cancer.2.aspx)  
402 [cer.2.aspx](https://journals.lww.com/ijnc/fulltext/2023/08020/Relationship_between_parity_and_breast_cancer.2.aspx).
- 403 19. Fortner RT, Sisti J, Chai B, Collins LC, Rosner B, Hankinson SE, et al. Parity, breastfeeding, and  
404 breast cancer risk by hormone receptor status and molecular phenotype: results from the Nurses'

- 405 Health Studies. *Breast Cancer Res.* 2019;21(1):40. [https://breast-cancer-](https://breast-cancer-research.biomedcentral.com/articles/10.1186/s13058-019-1119-y)  
406 [research.biomedcentral.com/articles/10.1186/s13058-019-1119-y](https://breast-cancer-research.biomedcentral.com/articles/10.1186/s13058-019-1119-y).
- 407 20. Balekouzou A, Yin P, Pamatika CM, Bekolo CE, Nambei SW, Djeintote M, et al. Reproductive risk  
408 factors associated with breast cancer in women in Bangui: a case–control study. *BMC Women’s*  
409 *Health.* 2017;17(1):14. [http://bmcwomenshealth.biomedcentral.com/articles/10.1186/s12905-017-](http://bmcwomenshealth.biomedcentral.com/articles/10.1186/s12905-017-0368-0)  
410 [0368-0](http://bmcwomenshealth.biomedcentral.com/articles/10.1186/s12905-017-0368-0).
- 411 21. Lambertini M, Santoro L, Del Mastro L, Nguyen B, Livraghi L, Ugolini D, et al. Reproductive  
412 behaviors and risk of developing breast cancer according to tumor subtype: A systematic review and  
413 meta-analysis of epidemiological studies. *Cancer Treatment Reviews.* 2016; 49:65–76.  
414 <https://linkinghub.elsevier.com/retrieve/pii/S0305737216300627>.
- 415 22. Romieu I, Biessy C, Joffe M, Cubasch H, Norris S, Vorster HH, et al. Reproductive factors and risk  
416 of breast cancer in black South African women. *Cancer Causes Control.* 2021;32(4):415–22.  
417 <http://link.springer.com/10.1007/s10552-021-01390-9>.
- 418 23. Azubuike SO, Hayes L, Sharp L, McNally R. Reproductive factors and the risk of breast cancer  
419 among Nigerian women by age and oestrogen receptor status. *Cancer Causes Control.*  
420 2022;33(12):1401–12. <https://link.springer.com/10.1007/s10552-022-01629-z>.
- 421 24. Akoko LO, Rutashobya AK, Lutainulwa EW, Mwanga AH, Kivuyo SL. The effect of reproductive,  
422 hormonal, nutritional and lifestyle on breast cancer risk among black Tanzanian women: A case  
423 control study. Doku DT, editor. *PLoS ONE* [Internet]. 2022 Feb 9 [cited 2024;17(2):e0263374].  
424 <https://dx.plos.org/10.1371/journal.pone.0263374>.

- 425 25. Guo W, Fensom GK, Reeves GK, Key TJ. Physical activity and breast cancer risk: results from the  
426 UK Biobank prospective cohort. *Br J Cancer*. 2020;122(5):726–32.  
427 <https://www.nature.com/articles/s41416-019-0700-6>.
- 428 26. Hardefeldt PJ, Penninkilampi R, Edirimanne S, Eslick GD. Physical Activity and Weight Loss  
429 Reduce the Risk of Breast Cancer: A Meta-analysis of 139 Prospective and Retrospective Studies.  
430 *Clinical Breast Cancer*. 2018;18(4):e601–12.  
431 <https://linkinghub.elsevier.com/retrieve/pii/S1526820916304293>.
- 432 27. Chan DSM, Abar L, Cariolou M, Nanu N, Greenwood DC, Bandera EV, et al. World Cancer  
433 Research Fund International: Continuous Update Project—systematic literature review and meta-  
434 analysis of observational cohort studies on physical activity, sedentary behavior, adiposity, and  
435 weight change and breast cancer risk. *Cancer Causes Control*. 2019;30(11):1183–200.  
436 <http://link.springer.com/10.1007/s10552-019-01223-w>.
- 437 28. Bucy AM, Valencia CI, Howe CL, Larkin TJ, Conard KD, Anderlik EW, et al. Physical Activity in  
438 Young BRCA Carriers and Reduced Risk of Breast Cancer. *American Journal of Preventive*  
439 *Medicine*. 2022;63(5):837–45. <https://linkinghub.elsevier.com/retrieve/pii/S074937972200246X>.
- 440 29. Xu Y, Rogers CJ. Physical Activity and Breast Cancer Prevention: Possible Role of Immune  
441 Mediators. *Front Nutr*. 2020; 7:557997.  
442 <https://www.frontiersin.org/article/10.3389/fnut.2020.557997/full>.
- 443 30. Bardaweel SK, Akour AA, Al-Muhaissen S, AlSalamat HA, Ammar K. Oral contraceptive and breast  
444 cancer: do benefits outweigh the risks? A case – control study from Jordan. *BMC Women’s Health*.  
445 2019;19(1):72. <https://bmcwomenshealth.biomedcentral.com/articles/10.1186/s12905-019-0770-x>.

- 446 31. He K, Dalton VK, Zochowski MK, Hall KS. Women's Contraceptive Preference-Use Mismatch. *J*  
447 *Womens Health (Larchmt)*. 2017 Jun;26(6):692–701.
- 448 32. Moreira LR, Ewerling F, Barros AJD, Silveira MF. Reasons for nonuse of contraceptive methods by  
449 women with demand for contraception not satisfied: an assessment of low and middle-income  
450 countries using demographic and health surveys. *Reprod Health*. 2019;16(1):148.  
451 <https://reproductive-health-journal.biomedcentral.com/articles/10.1186/s12978-019-0805-7>.
- 452 33. Hassan NEM, Khedr NFH, El-Sayed HESM. Women Preference for Family Planning Methods.  
453 *IJN*. 2020;7(2). <http://ijnnet.com/vol-7-no-2-december-2020-abstract-13-ijn>.
- 454 34. Frederiksen B. The Sexual and Reproductive Health Landscape In the US: Current Trends and  
455 Impact of the Pandemic. 2021. [https://policycommons.net/artifacts/1596123/the-sexual-and-](https://policycommons.net/artifacts/1596123/the-sexual-and-reproductive-health-landscape-in-the-us/2285892/)  
456 [reproductive-health-landscape-in-the-us/2285892/](https://policycommons.net/artifacts/1596123/the-sexual-and-reproductive-health-landscape-in-the-us/2285892/).
- 457 35. Kavanaugh ML, Pliskin E, Jerman J. Use of concurrent multiple methods of contraception in the  
458 United States, 2008 to 2015. *Contraception: X*. 2021; 3:100060.  
459 <https://linkinghub.elsevier.com/retrieve/pii/S2590151621000071>.
- 460 36. Safdari-Dehcheshmeh F, Noroozi M, Taleghani F, Memar S. Factors influencing the delay in  
461 childbearing: A narrative review. *Iranian J Nursing Midwifery Res*. 2023;28(1):10.  
462 <http://www.ijnmrjournal.net/text.asp?2023/28/1/10/368514>.
- 463 37. Mons U, Gredner T, Behrens G, Stock C, Brenner H. Cancers Due to Smoking and High Alcohol  
464 Consumption. *Deutsches Ärzteblatt international*. 2018;  
465 <https://www.aerzteblatt.de/10.3238/arztebl.2018.0571>.



- 466 38. Ferrando-Terradez I, Dueñas L, Parčina I, Čopić N, Petronijević S, Beltrami G, et al. Women's  
467 Involvement in Steady Exercise (WISE): Study Protocol for a Randomized Controlled Trial.  
468 Healthcare. 2023;11(9):1279. <https://www.mdpi.com/2227-9032/11/9/1279>.
- 469 39. Wu XY, Han LH, Zhang JH, Luo S, Hu JW, Sun K. The influence of physical activity, sedentary  
470 behavior on health-related quality of life among the general population of children and adolescents:  
471 A systematic review. PLoS One. 2017;12(11):e0187668.
- 472 40. Malherbe F, Nel D, Molabe H, Cairncross L, Roodt L. Palpable breast lumps: An age-based  
473 approach to evaluation and diagnosis. S Afr Fam Pract [Internet]. 2022;64(1).  
474 <https://safpj.co.za/index.php/safpj/article/view/5571>.
- 475 41. Momenimovahed Z, Salehiniya H. Epidemiological characteristics of and risk factors for breast  
476 cancer in the world. Breast Cancer (Dove Med Press). 2019; 11:151–64.  
477 <https://www.ncbi.nlm.nih.gov/pmc/articles/PMC6462164/>.
- 478 42. Hirko KA, Rocque G, Reasor E, Taye A, Daly A, Cutress RI, et al. The impact of race and ethnicity  
479 in breast cancer—disparities and implications for precision oncology. BMC Med. 2022;20(1):72.  
480 <https://bmcmmedicine.biomedcentral.com/articles/10.1186/s12916-022-02260-0>.
- 481 43. Yedjou CG, Sims JN, Miele L, Noubissi F, Lowe L, Fonseca DD, et al. Health and Racial Disparity  
482 in Breast Cancer. In: Ahmad A, editor. Breast Cancer Metastasis and Drug Resistance. Cham:  
483 Springer International Publishing; 2019. p. 31–49. (Advances in Experimental Medicine and  
484 Biology; vol. 1152). [http://link.springer.com/10.1007/978-3-030-20301-6\\_3](http://link.springer.com/10.1007/978-3-030-20301-6_3).
- 485 44. Stringer-Reasor EM, Elkhanany A, Khoury K, Simon MA, Newman LA. Disparities in Breast  
486 Cancer Associated with African American Identity. American Society of Clinical Oncology

- 487 Educational Book [Internet]. 2021;(41):e29–46.  
488 [https://ascopubs.org/doi/10.1200/EDBK\\_319929](https://ascopubs.org/doi/10.1200/EDBK_319929).
- 489 45. Sayed S, Field A, Rajab J, Mutuiru A, Githanga J, Mungania M, et al. Task Sharing and Shifting to  
490 Provide Pathology Diagnostic Services: The Kenya Fine-Needle Aspiration Biopsy Cytology and  
491 Bone Marrow Aspiration and Trephine Biopsy Training Program. *JGO*. 2018;(4):1–11.
- 492 46. Jiang R, Wang X, Sun Z, Wu S, Chen S, Cai H. Association of education level with the risk of  
493 female breast cancer: a prospective cohort study. *BMC Women's Health*. 2023;23(1):91.  
494 <https://bmcwomenshealth.biomedcentral.com/articles/10.1186/s12905-023-02245-y>.
- 495 47. Dong JY, Qin LQ. Education level and breast cancer incidence: a meta-analysis of cohort studies.  
496 *Menopause*. 2020;27(1):113–8. <https://journals.lww.com/00042192-202001000-00018>.
- 497 48. Machiyama K, Mumah JN, Mutua M, Cleland J. Childbearing desires and behaviour: a prospective  
498 assessment in Nairobi slums. *BMC Pregnancy and Childbirth*. 2019;28;19(1):100.  
499 <https://doi.org/10.1186/s12884-019-2245-3>.
- 500 49. Han Y, Moore JX, Colditz GA, Toriola AT. Family History of Breast Cancer and Mammographic  
501 Breast Density in Premenopausal Women. *JAMA Netw Open*. 2022;5(2): e2148983.  
502 <https://jamanetwork.com/journals/jamanetworkopen/fullarticle/2789129>.
- 503 50. Ekpe E, Shaikh AJ, Shah J, Jacobson JS, Sayed S. Metastatic Breast Cancer in Kenya: Presentation,  
504 Pathologic Characteristics, and Patterns—Findings from a Tertiary Cancer Center. *JGO*.  
505 2019;(5):1–11. <https://ascopubs.org/doi/10.1200/JGO.19.00036>.
- 506 51. Durham DD, Abraham LA, Roberts MC, Khan CP, Smith RA, Kerlikowske K, et al. Breast cancer  
507 incidence among women with a family history of breast cancer by relative's age at diagnosis.

- 508 Cancer. 2022;128(24):4232–40.  
509 <https://acsjournals.onlinelibrary.wiley.com/doi/10.1002/cncr.34365>.
- 510 52. Anyigba CA, Awandare GA, Paemka L. Breast cancer in sub-Saharan Africa: The current state and  
511 uncertain future. *Exp Biol Med* (Maywood). 2021;246(12):1377–87.  
512 <http://journals.sagepub.com/doi/10.1177/15353702211006047>.
- 513 53. Braithwaite D, Miglioretti DL, Zhu W, Demb J, Trentham-Dietz A, Sprague B, et al. Family  
514 History and Breast Cancer Risk Among Older Women in the Breast Cancer Surveillance  
515 Consortium Cohort. *JAMA Intern Med* [Internet]. 2018;178(4):494.  
516 <http://archinte.jamanetwork.com/article.aspx?doi=10.1001/jamainternmed.2017.8642>.

517

## 518 **Supporting information**

- 519 **S1 File:** Harvard Dataverse: Replication data for: Factors associated with breast lesions among  
520 women attending select teaching and referral health facilities in Kenya: a cross-sectional study,  
521 <https://doi.org/10.7910/DVN/2OXWTA>.

522

523
